# Supplementary material for: Estimating Phosphene Locations Using Eye Movements of Suprachoroidal Retinal Prosthesis Users
Source: PubMed Central journal article supplement — Transl Vis Sci Technol. 2023 Mar 21;12(3):20. doi: 10.1167/tvst.12.3.20 (PMC10043502; doi:10.1167/tvst.12.3.20), 2023-03-21
Supplement: tvst-12-3-20_s001.pdf [file tvst-12-3-20_s001.pdf]

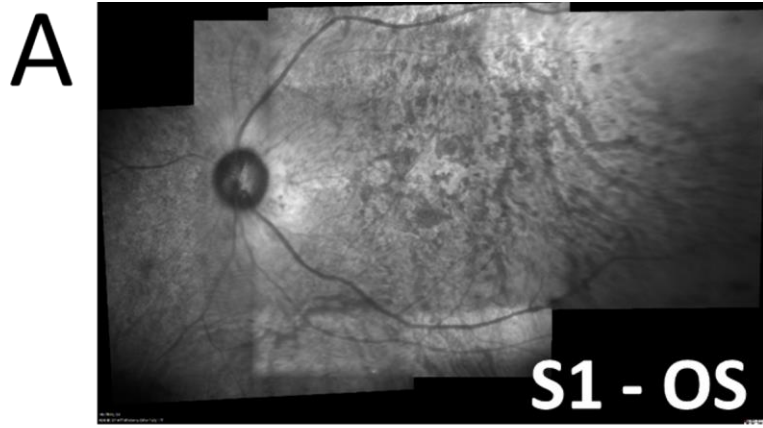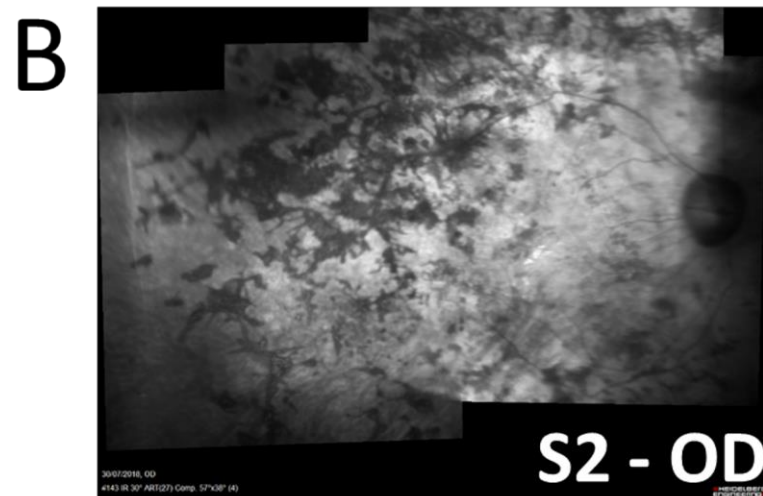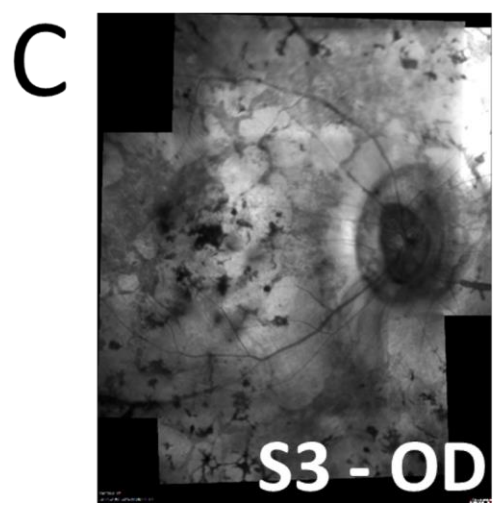

*Supplementary Figure 1 – Pre-operative near-infrared fundus imaging for each subject: A) Subject S1, left eye; B) Subject S2, right eye; C) Subject S3, right eye. Each panel is a composite of several images stitched together (Heidelberg Spectralis, Germany).*
