# Supplementary material for: Estimating Phosphene Locations Using Eye Movements of Suprachoroidal Retinal Prosthesis Users
Source: PubMed Central journal article supplement — Transl Vis Sci Technol. 2023 Mar 21;12(3):20. doi: 10.1167/tvst.12.3.20 (PMC10043502; doi:10.1167/tvst.12.3.20), 2023-03-21
Supplement: tvst-12-3-20_s002.pdf [file tvst-12-3-20_s002.pdf]

**A** S1 – Distance from Perceived Phosphene to Electrode Position by Saccade Latency

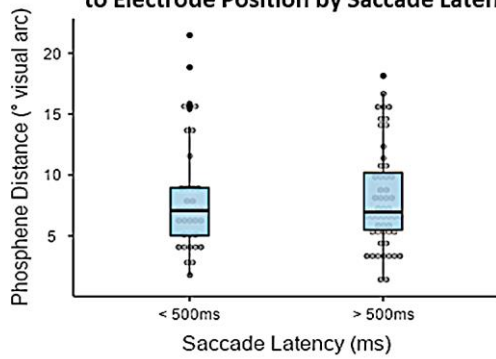

**B** S2 – Distance from Perceived Phosphene to Electrode Position by Saccade Latency

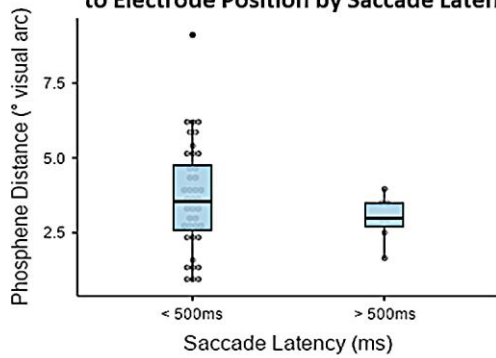

**C** S3 – Distance from Perceived Phosphene to Electrode Position by Saccade Latency

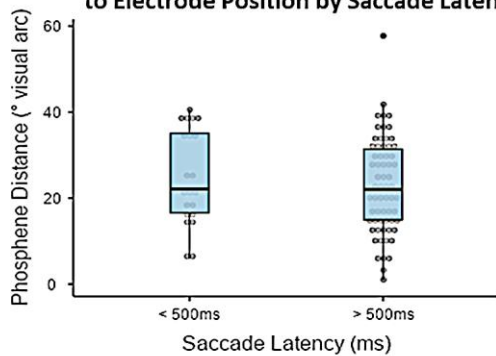

Supplementary Figure 2 – Distance between estimated phosphene location based on visual saccade and estimated location based on physical location of the electrode, grouped by saccade latency relative to stimulus duration (500 milliseconds). Data for subjects S1 to S3 are shown separately on panels A to C, respectively. Box plots show the median and range between 25<sup>th</sup> and 75<sup>th</sup> percentiles. Whiskers extend to 1.5x the inter-quartile range.
